# Supplementary material
Source: publisher figshare collection journal article supplement (https://acs.figshare.com/ndownloader/files/4125829)
Supplement: Supplementary file 1 [file 4125829]

## **Support information:**

# **Mesoporous Zirconium Phosphonate Hybrid Material as Adsorbent to Heavy Metal Ions**

Yunjie Jia,<sup>†</sup> Yuejuan Zhang,<sup>†</sup> Ruiwei Wang,<sup>‡</sup> Jianjun Yi,<sup>ζ</sup> Xu Feng<sup>§</sup>

and Qinghong Xu<sup>†,\*</sup>

<sup>†</sup>State Key Laboratory of Chemical Resource Engineering, Beijing University of Chemical Technology, Beijing, China 100029

<sup>‡</sup>State Key Laboratory of Inorganic Synthesis and Preparative Chemistry, Jilin University, Changchun, China 130012

<sup>ζ</sup>Petrochemical Research Institute, PetroChina Company Limited, Beijing, China 100083

<sup>§</sup>Shimadzu (China) Co., Ltd, Beijing, China 100020

E-mail: xuqh@mail.buct.edu.cn

**This supporting information includes: Total organic carbon (TOC) analysis to NTAZP (Figure S1 and Table S1)**

Total organic carbon (TOC) analysis to NTAZP is tested on a Shimadzu TOC-V CPH spectrometer. Two samples, whose mass are 100.0 mg and 100.1 mg respectively, were test. Some relative results are as following.

Figure S1 is the TOC graphic of NTAZP and the analytic result is listed in Table S1. It can be found that total organic carbon mass in the two samples are 7.218 mg and 7.233 mg, respectively. Contents of carbon in the two samples are 7.218 % and 7.226 %. Average content of carbon in the sample is 7.226 %.

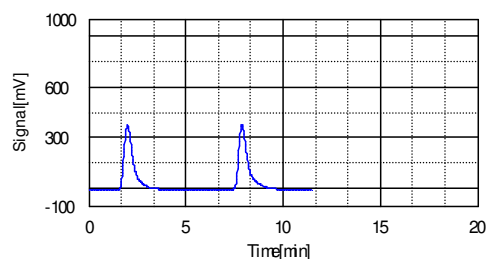

Figure S1. TOC analytic graphic of NTAZP.

Table S1. Formations from the total organic carbon measurements.

| Spl. No | Inj. No. | Area | Conc. (%) | Mean conc (%) | Result (mg)  | Mass (mg) | SD Conc. | CV Conc. |
|---------|----------|------|-----------|---------------|--------------|-----------|----------|----------|
| 1       | 1        | 1257 | 7.218     | 7.226         | SSM-TC 7.226 | 100.0     | 0.01000  | 0.11     |
|         | 2        | 1259 | 7.233     |               |              | 100.1     |          |          |
